# Supplementary material for: XRate: a fast prototyping, training and annotation tool for phylo-grammars
Source: Springer Nature journal article supplement (doi:10.1186/1471-2105-7-428), 2006-10-03
Supplement: 12859_2006_1167_MOESM3_ESM.pdf [file 12859_2006_1167_MOESM3_ESM.pdf]

$$\begin{pmatrix} \cdot & \beta\pi\sigma & \alpha\pi\sigma & \beta\pi\tau \\ \beta\pi\alpha & \cdot & \beta\pi\sigma & \alpha\pi\tau \\ \alpha\pi\alpha & \beta\pi\sigma & \cdot & \beta\pi\tau \\ \beta\pi\alpha & \alpha\pi\sigma & \beta\pi\sigma & \cdot \end{pmatrix}$$
