# Supplementary material for: XRate: a fast prototyping, training and annotation tool for phylo-grammars
Source: Springer Nature journal article supplement (doi:10.1186/1471-2105-7-428), 2006-10-03
Supplement: 12859_2006_1167_MOESM5_ESM.pdf [file 12859_2006_1167_MOESM5_ESM.pdf]

```
;; State ALPHA: emits a single column of an alpha helix
(transform (from (ALPHA)) (to (alpha_col ALPHA*)))
(annotate (row SS) (column alpha_col) (label H)))
(transform (from (ALPHA*)) (to (ALPHA)) (prob 0.873573))
(transform (from (ALPHA*)) (to (BETA)) (prob 0.00223424))
(transform (from (ALPHA*)) (to (LOOP)) (prob 0.12474))

;; State BETA: emits a single column of a beta sheet
(transform (from (BETA)) (to (beta_col BETA*)))
(annotate (row DSSP) (column beta_col) (label E)))
(transform (from (BETA*)) (to (ALPHA)) (prob 0.00794355))
(transform (from (BETA*)) (to (BETA)) (prob 0.754713))
(transform (from (BETA*)) (to (LOOP)) (prob 0.237665))

;; State LOOP: emits a single column of a loop
(transform (from (LOOP)) (to (loop_col LOOP*)))
(annotate (row DSSP) (column loop_col) (label L)))
(transform (from (LOOP*)) (to ()) (prob 0.00541809))
(transform (from (LOOP*)) (to (ALPHA)) (prob 0.106137))
(transform (from (LOOP*)) (to (BETA)) (prob 0.0615115))
(transform (from (LOOP*)) (to (LOOP)) (prob 0.827023))
```
