# Supplementary material for: XRate: a fast prototyping, training and annotation tool for phylo-grammars
Source: Springer Nature journal article supplement (doi:10.1186/1471-2105-7-428), 2006-10-03
Supplement: 12859_2006_1167_MOESM6_ESM.pdf [file 12859_2006_1167_MOESM6_ESM.pdf]

# STOCKHOLM 1.0

#=GF ID pp

#=GF CLASS small

#=GF FAMILY pancreatic hormone

1bba APLEPEYPGDNATPEQMAQYAAELRRYINMLTRPRY

1ppt GPSQPTYPGDDAPVEDLIRFYDNLQQYLNVVTRHRY

1ron YPSKPDNPGEDAPAEDMARYYSALRHYINLITRQRY

//
