# Supplementary material for: XRate: a fast prototyping, training and annotation tool for phylo-grammars
Source: Springer Nature journal article supplement (doi:10.1186/1471-2105-7-428), 2006-10-03
Supplement: 12859_2006_1167_MOESM7_ESM.pdf [file 12859_2006_1167_MOESM7_ESM.pdf]

```
1 # STOCKHOLM 1.0
2 #=GF NH (1ron:0.1274,(1bba:0.5087,1ppt:0.5034)node_3:0.1122)root;
3 #=GF SC_max_PROT3 -352.209
4 1bba      APLEPEYPGDNATPEQMAQYAAELRRYINMLTRPRY
5 1ppt      GPSQPTYPGDDAPVEDLIRFYDNLQQYLNVVTRHRY
6 1ron      YPSKPDNPGEDAPAEDMARYYSALRHYINLITRQRY
7 #=GC DSSP  LLLLLLLLLLLLLLLLLHHHHHHHHHHHHHHHHHHHLLL
8 //
```
