# Supplementary material for: XRate: a fast prototyping, training and annotation tool for phylo-grammars
Source: Springer Nature journal article supplement (doi:10.1186/1471-2105-7-428), 2006-10-03
Supplement: 12859_2006_1167_MOESM8_ESM.pdf [file 12859_2006_1167_MOESM8_ESM.pdf]

```
;; state S: the initial state. Goes to L or B
(transform (from (S)) (to (L)) (prob 0.131488))
(transform (from (S)) (to (B)) (prob 0.868742))

;; state F: emits a covarying base pair
(transform (from (F)) (to (LNUC F* RNUC))
 (annotate (row PFOLD) (column LNUC) (label <))
 (annotate (row PFOLD) (column RNUC) (label >)))
(transform (from (F*)) (to (F)) (prob 0.787854))
(transform (from (F*)) (to (B)) (prob 0.212421))

;; state L: goes to U (unpaired base) or F (basepair)
(transform (from (L)) (to (F)) (prob 0.105404))
(transform (from (L)) (to (U)) (prob 0.895025))

;; state B: generates a bifurcation in the parse tree
(transform (from (B)) (to (L S)))

;; state U: emits a single unpaired base, then terminates
(transform (from (U)) (to (NUC U*))
 (annotate (row PFOLD) (column NUC) (label _)))
(transform (from (U*)) (to ()) (prob 1))
```
