# Supplementary material for: XRate: a fast prototyping, training and annotation tool for phylo-grammars
Source: Springer Nature journal article supplement (doi:10.1186/1471-2105-7-428), 2006-10-03
Supplement: 12859_2006_1167_MOESM15_ESM.pdf [file 12859_2006_1167_MOESM15_ESM.pdf]

05

to

A A A A C C C C G G G G U U U U  
 A C G U A C G U A C G U A C G U

from

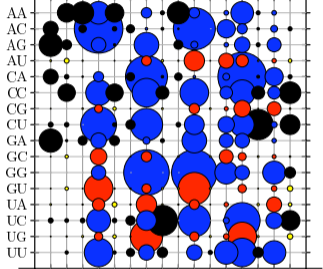

A A A A C C C C G G G G U U U U  
 A C G U A C G U A C G U A C G U

prob.

05

to

A A A A C C C C G G G G U U U U  
 A C G U A C G U A C G U A C G U

from

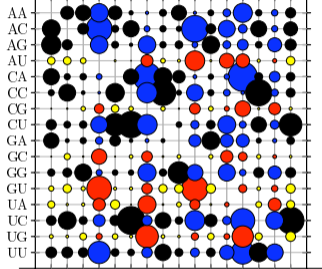

A A A A C C C C G G G G U U U U  
 A C G U A C G U A C G U A C G U

prob.
