# Supplementary material for: XRate: a fast prototyping, training and annotation tool for phylo-grammars
Source: Springer Nature journal article supplement (doi:10.1186/1471-2105-7-428), 2006-10-03

0.5

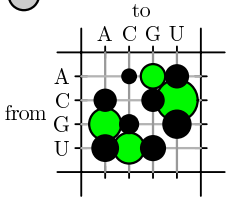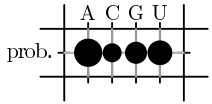

0.5

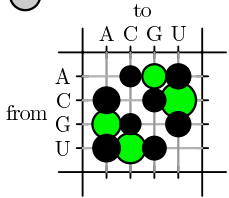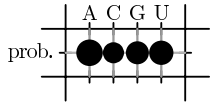

Supplement: 12859_2006_1167_MOESM17_ESM.pdf [file 12859_2006_1167_MOESM17_ESM.pdf]
